# Supplementary material for: The development of the anterior cruciate ligament in the paediatric population
Source: Springer Nature journal article supplement (doi:10.1007/s00167-019-05349-x), 2019-01-22
Supplement: MOESM1 [file 16411864]

SUPPLEMENTARY MATERIAL:

THE DEVELOPMENT OF THE ANTERIOR CRUCIATE LIGAMENT IN THE PEDIATRIC POPULATION

Supplementary Table I - Supplementary material shows the clinical indications for knee MRI examinations

| CLINICAL INDICATION | n | (%) |
| --- | --- | --- |
| Arthralgia | 73 | 31.7% |
| Condropathy | 50 | 21.7% |
| Meniscopathy | 30 | 13.0% |
| Patellofemoral Pain Syndrome | 17 | 7.3% |
| Osteochondritis dissecans | 12 | 5.2% |
| Popliteal cyst | 10 | 4.3% |
| Discoid meniscus | 10 | 4.3% |
| Contusion | 9 | 3.9% |
| Osgood Schlatter disease | 6 | 2.6% |
| Tendinopathy | 5 | 2.1% |
| Synovitis | 3 | 1.3% |
| Arthritis | 3 | 1.3% |
| Joint Effusion | 1 | 0.4% |

Supplementary Table II - Supplementary material shows the percentile values (2.5, 10, 25, 50, 75, 90, and 97.5) across the different ages.

|  |  | Female | | | | | | |  | Male | | | | | | |
| --- | --- | --- | --- | --- | --- | --- | --- | --- | --- | --- | --- | --- | --- | --- | --- | --- |
|  | Age/  Percentiles | 2,5 | 10 | 25 | 50 | 75 | 90 | 97,5 |  | 2,5 | 10 | 25 | 50 | 75 | 90 | 97,5 |
| ACL-Length  (mm) | 6 | 21.0 | 21.8 | 22.56 | 23.3 | 24.1 | 24.89 | 25.7 |  | 17.7 | 20.1 | 22.3 | 24.7 | 27.1 | 29.3 | 31.7 |
| 7 | 21.2 | 22.7 | 24.02 | 25.4 | 26.9 | 28.23 | 29.6 |  | 21.8 | 23.3 | 24.6 | 26.0 | 27.5 | 28.8 | 30.2 |
| 8 | 22.7 | 24.3 | 25.76 | 27.3 | 28.9 | 30.32 | 31.9 |  | 21.6 | 23.6 | 25.5 | 27.5 | 29.5 | 31.4 | 33.4 |
| 9 | 24.7 | 26.1 | 27.49 | 28.9 | 30.4 | 31.71 | 33.1 |  | 22.7 | 24.9 | 26.9 | 29.1 | 31.3 | 33.3 | 35.5 |
| 10 | 26.5 | 27.8 | 29.02 | 30.3 | 31.6 | 32.79 | 34.1 |  | 24.6 | 26.7 | 28.6 | 30.7 | 32.8 | 34.7 | 36.8 |
| 11 | 27.9 | 29.1 | 30.23 | 31.4 | 32.6 | 33.76 | 34.9 |  | 26.5 | 28.5 | 30.3 | 32.3 | 34.3 | 36.1 | 38.2 |
| 12 | 28.7 | 29.9 | 31.08 | 32.3 | 33.5 | 34.68 | 35.9 |  | 27.8 | 29.9 | 31.7 | 33.8 | 35.9 | 37.8 | 39.9 |
| 13 | 29.0 | 30.4 | 31.61 | 32.9 | 34.3 | 35.52 | 36.8 |  | 28.7 | 30.9 | 32.9 | 35.1 | 37.4 | 39.4 | 41.6 |
| 14 | 29.0 | 30.5 | 31.86 | 33.3 | 34.8 | 36.18 | 37.6 |  | 29.5 | 31.8 | 33.9 | 36.2 | 38.5 | 40.5 | 42.8 |
| 15 | 28.8 | 30.4 | 31.88 | 33.4 | 35.1 | 36.56 | 38.1 |  | 30.5 | 32.7 | 34.7 | 36.9 | 39.1 | 41.0 | 43.2 |
| 16 | 28.5 | 30.2 | 31.73 | 33.3 | 35.5 | 36.54 | 38.2 |  | 31.5 | 33.4 | 35.2 | 37.1 | 39.0 | 40.8 | 42.7 |
| 17 | 28.4 | 30.0 | 31.46 | 33.0 | 34.6 | 36.04 | 37.6 |  | 31.9 | 33.6 | 35.1 | 36.8 | 38.4 | 40.0 | 41.6 |
| 18 | 28.6 | 29.9 | 31.13 | 32.4 | 33.7 | 34.95 | 36.2 |  | 30.4 | 32.3 | 33.9 | 35.7 | 37.6 | 39.2 | 41.1 |

Supplementary Table III - Supplementary material shows the percentile values (2.5, 10, 25, 50, 75, 90, and 97.5) across the different ages.

| Female | | | | | | |  |  | | | | | | |  | Male | | | | |
| --- | --- | --- | --- | --- | --- | --- | --- | --- | --- | --- | --- | --- | --- | --- | --- | --- | --- | --- | --- | --- |
|  | Age/  Percentiles | 2.5 | 10 | 25 | 50 | 75 | | | 90 | 97.5 |  | 2.5 | 10 | 25 | | | 50 | 75 | 90 | 97.5 |
| ACL-SIA  (degrees) | 6 | 37.4 | 40.4 | 43.1 | 46.1 | 49.1 | | | 51.8 | 54.8 |  | 30.2 | 34.4 | 38.1 | | | 42.2 | 46.3 | 50.0 | 54.1 |
| 7 | 39.2 | 42.4 | 45.3 | 48.6 | 51.8 | | | 54.7 | 57.9 |  | 33.1 | 36.8 | 40.1 | | | 43.8 | 47.5 | 50.8 | 54.5 |
| 8 | 41.1 | 44.3 | 47.3 | 50.5 | 53.7 | | | 56.7 | 59.9 |  | 38.0 | 40.6 | 42.9 | | | 45.4 | 48.0 | 50.3 | 52.8 |
| 9 | 43.9 | 46.7 | 49.2 | 52.0 | 54.8 | | | 57.3 | 60.1 |  | 39.3 | 42.0 | 44.4 | | | 47.1 | 49.8 | 52.2 | 54.9 |
| 10 | 46.4 | 48.8 | 50.9 | 53.2 | 55.6 | | | 57.7 | 60.1 |  | 38.9 | 42.3 | 45.3 | | | 48.7 | 52.1 | 55.1 | 58.5 |
| 11 | 47.6 | 49.9 | 51.9 | 54.2 | 56.4 | | | 58.5 | 60.7 |  | 39.2 | 43.0 | 46.4 | | | 50.2 | 54.0 | 57.4 | 61.2 |
| 12 | 47.4 | 50.0 | 52.3 | 54.9 | 57.4 | | | 59.7 | 62.3 |  | 41.0 | 44.6 | 47.9 | | | 51.5 | 55.1 | 58.4 | 62.0 |
| 13 | 46.4 | 49.5 | 52.3 | 55.4 | 58.5 | | | 61.2 | 64.4 |  | 43.8 | 46.9 | 49.6 | | | 52.6 | 55.7 | 58.4 | 61.4 |
| 14 | 45.2 | 48.9 | 52.1 | 55.7 | 59.4 | | | 62.6 | 66.3 |  | 46.7 | 49.1 | 51.2 | | | 53.5 | 55.8 | 57.9 | 60.2 |
| 15 | 44.5 | 48.5 | 52.0 | 56.0 | 59.9 | | | 63.4 | 67.4 |  | 48.5 | 50.4 | 52.1 | | | 54.0 | 55.9 | 57.6 | 59.5 |
| 16 | 44.9 | 48.8 | 52.2 | 56.0 | 59.9 | | | 63.3 | 67.2 |  | 48.5 | 50.5 | 52.2 | | | 54.2 | 56.1 | 57.8 | 59.8 |
| 17 | 46.6 | 49.9 | 52.8 | 56.0 | 59.3 | | | 62.2 | 65.5 |  | 46.6 | 49.1 | 51.4 | | | 53.9 | 56.4 | 58.6 | 61.1 |
| 18 | 49.5 | 51.7 | 53.7 | 55.9 | 58.1 | | | 60.1 | 62.4 |  | 43.4 | 46.8 | 49.8 | | | 53.1 | 56.4 | 59.4 | 62.8 |

*ACL-SIA* anterior cruciate ligament sagittal inclination angle

Supplementary Table IV- Supplementary material shows the percentile values (2.5, 10, 25, 50, 75, 90, and 97.5) across the different ages.

|  |  | Female | | | | | | | |  | Male | | | | | | | |
| --- | --- | --- | --- | --- | --- | --- | --- | --- | --- | --- | --- | --- | --- | --- | --- | --- | --- | --- |
|  | Age/  Percentiles | 2.5 | 10 | 25 | 50 | 75 | 90 | 97.5 |  | | | 2.5 | 10 | 25 | 50 | 75 | 90 | 97.5 |
| ACL-CIA  (degrees) | 6 | 32.6 | 36.5 | 39.95 | 43.7 | 47.6 | 51.0 | 54.9 |  | | | 27.3 | 32.7 | 37.5 | 42.8 | 48.2 | 53.0 | 58.4 |
| 7 | 33.4 | 38.8 | 43.60 | 48.9 | 54.2 | 59.0 | 64.4 |  | | | 27.5 | 33.3 | 38.5 | 44.3 | 50.0 | 55.3 | 61.1 |
| 8 | 36.3 | 41.8 | 46.84 | 52.3 | 57.8 | 62.8 | 68.4 |  | | | 31.0 | 36.2 | 40.8 | 45.9 | 51.0 | 55.6 | 60.8 |
| 9 | 40.7 | 45.6 | 49.99 | 54.8 | 59.6 | 64.0 | 68.8 |  | | | 33.5 | 38.4 | 42.8 | 47.7 | 52.6 | 57.0 | 61.9 |
| 10 | 44.9 | 49.0 | 52.66 | 56.7 | 60.7 | 64.3 | 68.4 |  | | | 35.4 | 40.3 | 44.7 | 49.6 | 54.5 | 58.9 | 63.8 |
| 11 | 47.8 | 51.4 | 54.66 | 58.2 | 61.8 | 65.0 | 68.6 |  | | | 37.8 | 42.6 | 46.9 | 51.6 | 56.4 | 60.7 | 65.4 |
| 12 | 49.4 | 52.9 | 56.07 | 59.5 | 63.0 | 66.1 | 69.7 |  | | | 41.0 | 45.4 | 49.3 | 53.6 | 58.0 | 61.9 | 66.3 |
| 13 | 50.2 | 53.8 | 57.13 | 60.7 | 64.3 | 67.6 | 71.3 |  | | | 44.6 | 48.4 | 51.8 | 55.6 | 59.4 | 62.8 | 66.6 |
| 14 | 50.9 | 54.7 | 58.12 | 61.9 | 65.6 | 69.0 | 72.8 |  | | | 48.1 | 51.3 | 54.2 | 57.5 | 60.7 | 63.6 | 66.8 |
| 15 | 52.1 | 55.9 | 59.30 | 63.0 | 66.7 | 70.1 | 73.8 |  | | | 51.0 | 53.8 | 56.3 | 59.1 | 61.9 | 64.4 | 67.2 |
| 16 | 54.3 | 57.7 | 60.77 | 64.1 | 67.5 | 70.6 | 74.0 |  | | | 53.0 | 55.6 | 57.9 | 60.5 | 63.0 | 65.4 | 67.9 |
| 17 | 57.1 | 60.0 | 62.53 | 65.3 | 68.1 | 70.6 | 73.5 |  | | | 54.3 | 56.8 | 59.0 | 61.5 | 63.9 | 66.1 | 68.6 |
| 18 | 60.1 | 62. | 64.38 | 66.58 | 68.7 | 70.7 | 72.9 |  | | | 55.7 | 57.9 | 59.8 | 62.0 | 64.2 | 66.1 | 68.3 |

*ACL-CIA* Anterior cruciate ligament coronal inclination angle

Supplementary Table V - Supplementary material shows the percentile values (2.5, 10, 25, 50, 75, 90, and 97.5) across the different ages.

|  |  | Female | | | | | | | |  | Male | | | | | | | |
| --- | --- | --- | --- | --- | --- | --- | --- | --- | --- | --- | --- | --- | --- | --- | --- | --- | --- | --- |
|  | Age/  Percentiles | 2.5 | 10 | 25 | 50 | 75 | 90 | 97.5 |  | | | 2.5 | 10 | 25 | 50 | 75 | 90 | 97.5 |
| IRIA  (degrees) | 6 | 36.6 | 38.1 | 39.4 | 40.9 | 42.4 | 43.8 | 45.3 |  | | | 33.6 | 37.5 | 41.1 | 45.1 | 49.0 | 52.6 | 56.5 |
| 7 | 33.6 | 36.3 | 38.7 | 41.3 | 44.0 | 46.3 | 49.0 |  | | | 36.7 | 39.6 | 42.2 | 45.0 | 47.9 | 50.5 | 53.4 |
| 8 | 32.8 | 35.8 | 38.5 | 41.5 | 44.5 | 47.2 | 50.2 |  | | | 37.6 | 40.2 | 42.5 | 45.0 | 47.5 | 49.8 | 52.3 |
| 9 | 32.9 | 35.8 | 38.5 | 41.5 | 44.5 | 47.1 | 50.1 |  | | | 38.0 | 40.4 | 42.5 | 44.9 | 47.3 | 49.4 | 51.8 |
| 10 | 33.2 | 36.0 | 38.6 | 41.4 | 44.2 | 46.8 | 49.6 |  | | | 37.9 | 40.3 | 42.4 | 44.8 | 47.1 | 49.2 | 51.6 |
| 11 | 33.5 | 36.2 | 38.6 | 41.3 | 44.0 | 46.4 | 49.1 |  | | | 37.3 | 39.8 | 42.1 | 44.6 | 47.1 | 49.3 | 51.9 |
| 12 | 33.8 | 36.3 | 38.6 | 41.1 | 43.7 | 45.9 | 48.5 |  | | | 36.4 | 39.1 | 41.6 | 44.3 | 47.0 | 49.5 | 52.2 |
| 13 | 34.0 | 36.4 | 38.6 | 40.9 | 43.3 | 45.5 | 47.9 |  | | | 35.6 | 38.5 | 41.1 | 43.9 | 46.8 | 49.4 | 52.3 |
| 14 | 34.3 | 36.5 | 38.5 | 40.8 | 43.0 | 45.0 | 47.2 |  | | | 35.1 | 38.0 | 40.6 | 43.5 | 46.4 | 49.0 | 51.9 |
| 15 | 34.6 | 36.6 | 38.5 | 40.5 | 42.6 | 44.5 | 46.5 |  | | | 35.0 | 37.8 | 40.2 | 42.9 | 45.7 | 48.1 | 50.8 |
| 16 | 34.7 | 36.7 | 38.4 | 40.3 | 42.3 | 44.0 | 46.0 |  | | | 35.1 | 37.6 | 39.8 | 42.3 | 44.7 | 46.9 | 49.4 |
| 17 | 34.5 | 36.4 | 38.2 | 40.1 | 42.1 | 43.8 | 45.8 |  | | | 34.8 | 37.1 | 39.1 | 41.4 | 43.7 | 45.8 | 48.1 |
| 18 | 33.4 | 35.7 | 37.7 | 39.9 | 42.2 | 44.2 | 46.4 |  | | | 33.1 | 35.7 | 37.9 | 40.5 | 43.0 | 45.2 | 47.8 |

*IRIA* Intercondylar roof inclination angle

Supplementary Table VI - Supplementary material shows the percentile values (2.5, 10, 25, 50, 75, 90, and 97.5) across the different ages.

|  |  | Female | | | | | | | |  | Male | | | | | | | |
| --- | --- | --- | --- | --- | --- | --- | --- | --- | --- | --- | --- | --- | --- | --- | --- | --- | --- | --- |
|  | Age/  Percentiles | 2.5 | 10 | 25 | 50 | 75 | 90 | 97.5 |  | | | 2.5 | 10 | 25 | 50 | 75 | 90 | 97.5 |
| ACL area  (mm2) | 6 | 3.9 | 5.3 | 6.5 | 7.9 | 9.3 | 10.6 | 12.0 |  | | | 6.2 | 7.3 | 8.4 | 9.6 | 10.7 | 11.8 | 13.0 |
| 7 | 2.8 | 5.8 | 8.4 | 11.3 | 14.2 | 16.9 | 19.8 |  | | | 6.7 | 8.8 | 10.8 | 13.0 | 15.1 | 17.1 | 19.3 |
| 8 | 6.9 | 9.3 | 11.5 | 13.9 | 16.3 | 18.5 | 20.9 |  | | | 5.5 | 9.0 | 12.2 | 15.7 | 19.2 | 22.4 | 25.9 |
| 9 | 8.8 | 11.2 | 13.4 | 15.8 | 18.2 | 20.4 | 22.8 |  | | | 5.6 | 9.8 | 13.7 | 17.9 | 22.1 | 26.0 | 30.2 |
| 10 | 9.0 | 11.8 | 14.4 | 17.2 | 20.0 | 22.5 | 25.3 |  | | | 6.8 | 11.2 | 15.2 | 19.6 | 24.0 | 27.9 | 32.4 |
| 11 | 9.0 | 12.1 | 14.9 | 18.0 | 21.1 | 23.9 | 27.1 |  | | | 8.3 | 12.6 | 16.5 | 20.8 | 25.0 | 28.9 | 33.2 |
| 12 | 9.2 | 12.4 | 15.3 | 18.5 | 21.7 | 24.5 | 27.7 |  | | | 9.7 | 13.8 | 17.4 | 21.5 | 25.5 | 29.2 | 33.3 |
| 13 | 9.8 | 12.8 | 15.5 | 18.6 | 21.6 | 24.3 | 27.3 |  | | | 10.7 | 14.5 | 18.0 | 21.8 | 25.6 | 29.1 | 32.9 |
| 14 | 10.3 | 13.0 | 15.5 | 18.3 | 21.1 | 23.6 | 26.4 |  | | | 11.2 | 14.8 | 18.1 | 21.7 | 25.3 | 28.6 | 32.2 |
| 15 | 10.3 | 12.9 | 15.2 | 17.8 | 20.4 | 22.7 | 25.3 |  | | | 11.2 | 14.7 | 17.7 | 21.2 | 24.6 | 27.7 | 31.2 |
| 16 | 9.8 | 12.3 | 14.5 | 17.0 | 19.5 | 21.7 | 24.2 |  | | | 10.9 | 14.2 | 17.1 | 20.3 | 23.5 | 26.4 | 29.6 |
| 17 | 9.0 | 11.4 | 13.6 | 16.0 | 18.4 | 20.5 | 22.9 |  | | | 10.5 | 13.4 | 16.1 | 19.0 | 22.0 | 24.6 | 27.6 |
| 18 | 9.0 | 11.0 | 12.8 | 14.7 | 16.7 | 18.5 | 20.5 |  | | | 9.8 | 12.4 | 14.8 | 17.4 | 20.0 | 22.3 | 24.9 |


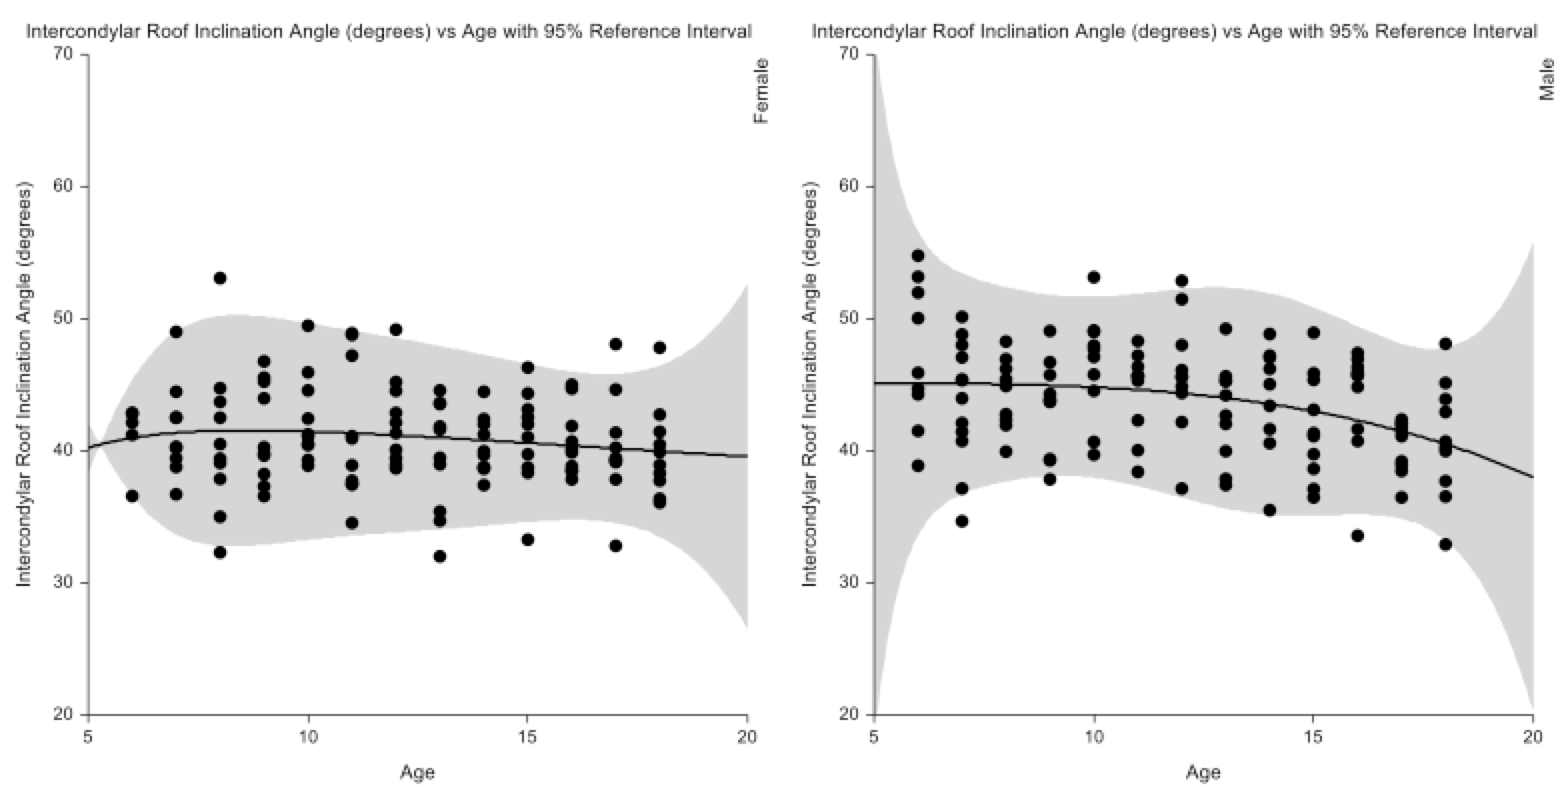


Supplementary Figure 1: Intercondylar Roof Inclination Angle as a function of patient age and sex. Polynomial regression curves, with corresponding 95% confidence intervals (shaded) for the model for female and for the model for male.





Supplementary Figure 2: Mean of height across the ages by sex and their respective error bars (95% confidence interval)
